# Supplementary material
Source: MDPI journal article supplement (https://www.mdpi.com/1999-4907/14/9/1888)
Supplement: s1 [file s1]

**Table S1.** Relative abundance of dominant phyla of different tree species in bulk and rhizosphere soils

| Soil                  | Tree species | Proteobacteria | Acidobacteria | Bacteroidetes | Actinobacteria |
|-----------------------|--------------|----------------|---------------|---------------|----------------|
| Bulk soil             | PO           | 0.2254         | 0.1904        | 0.1003        | 0.1836         |
|                       | SC           | 0.1961         | 0.2145        | 0.1255        | 0.1259         |
|                       | PS           | 0.2213         | 0.1798        | 0.1797        | 0.1505         |
|                       | PA           | 0.2752         | 0.1128        | 0.2172        | 0.1283         |
|                       | PT           | 0.2332         | 0.255         | 0.0946        | 0.1284         |
| Rhizosphere soil      | PO           | 0.2879         | 0.1354        | 0.1401        | 0.2568         |
|                       | SC           | 0.2279         | 0.1908        | 0.1024        | 0.1736         |
|                       | PS           | 0.253          | 0.215         | 0.1154        | 0.1367         |
|                       | PA           | 0.2612         | 0.1175        | 0.1109        | 0.2325         |
|                       | PT           | 0.2302         | 0.2529        | 0.1582        | 0.0979         |
| Summary of ANOVA test |              |                |               |               |                |
| Tree species          |              | ***            | ***           | ***           | ***            |
| Soil                  |              | ***            | **            | ***           | ***            |
| Tree species × soil   |              | ***            | ***           | ***           | ***            |

Note: Values are mean (n = 3). \*p < 0.05, \*\*p < 0.01, \*\*\*p < 0.001; ns, indicates no significant effect.
